# Supplementary material
Source: PubMed Central journal article supplement (PMC5858711)
Supplement: NIHMS819025-supplement.pdf [file NIHMS819025-supplement.pdf]

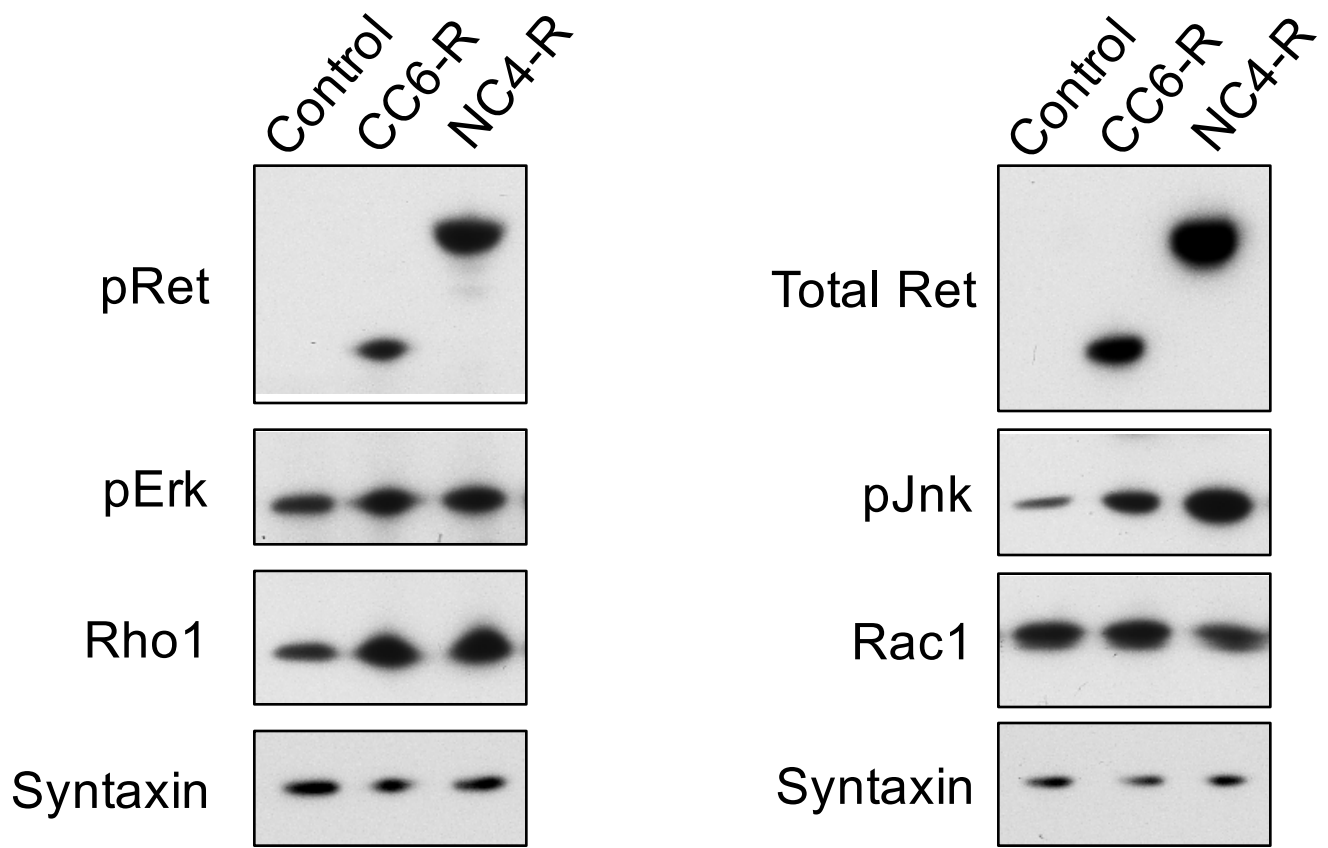

Levinson et al, Supplemental Figure 1

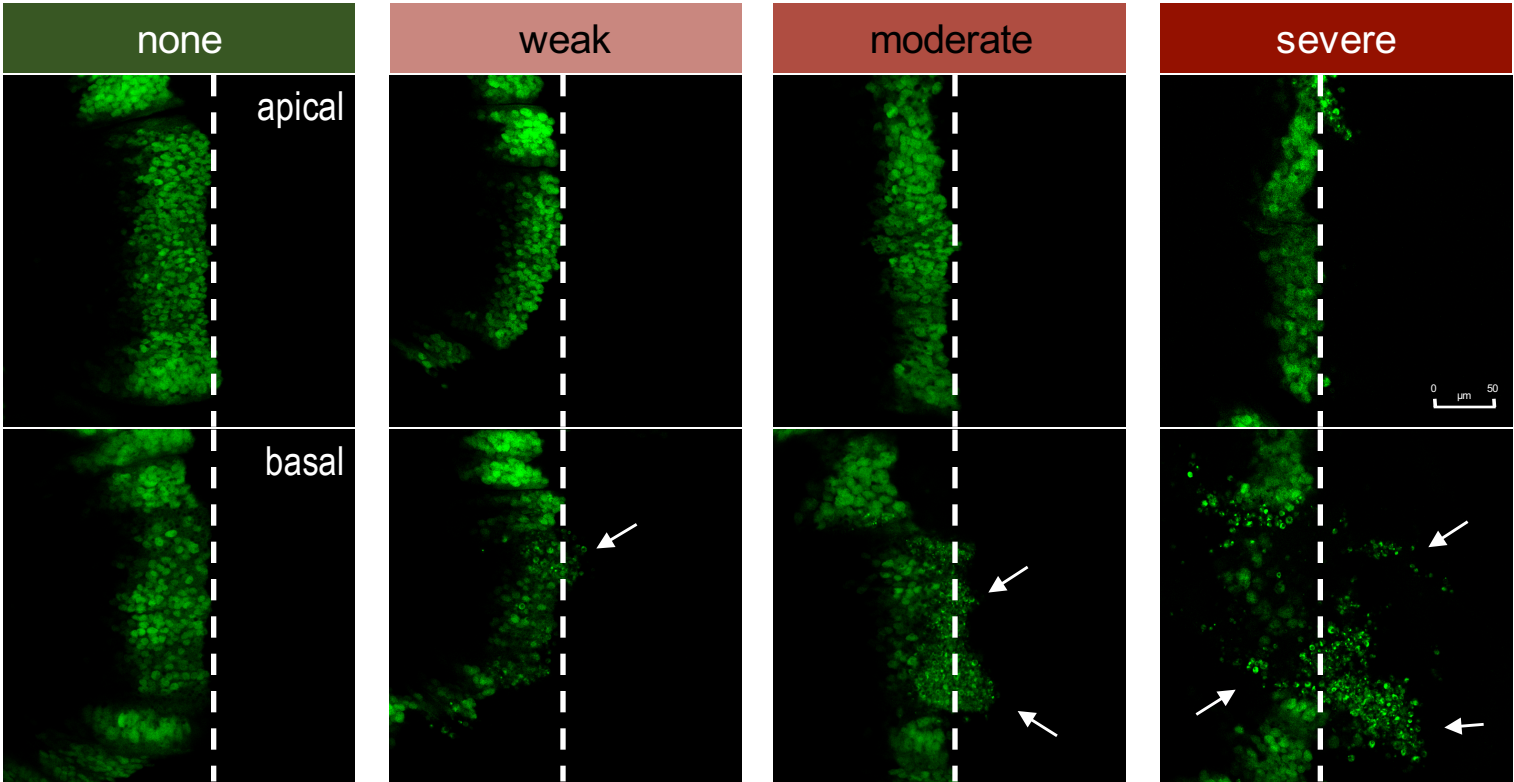

Levinson et al, Supplemental Figure 2

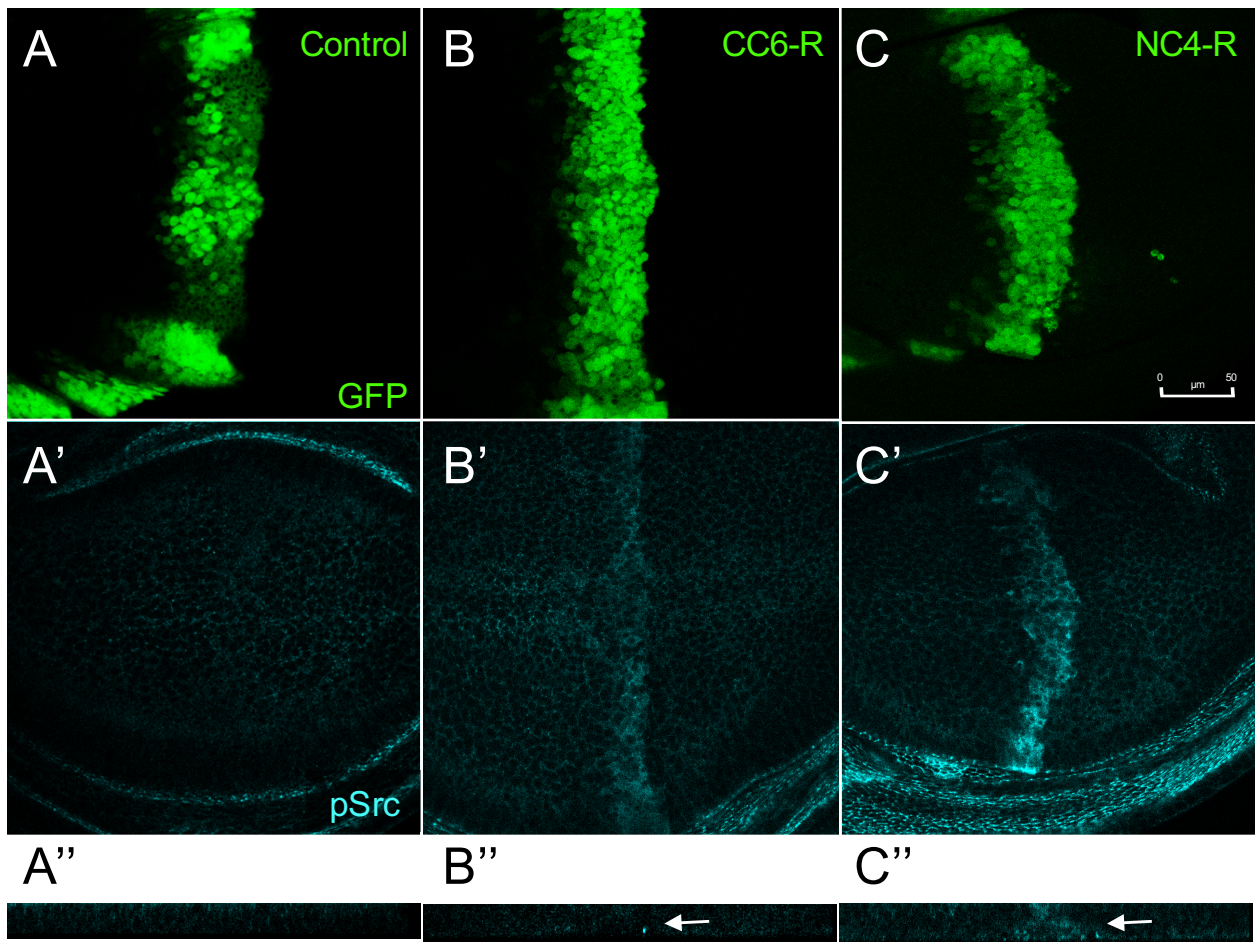

Levinson et al, Supplemental Figure 3

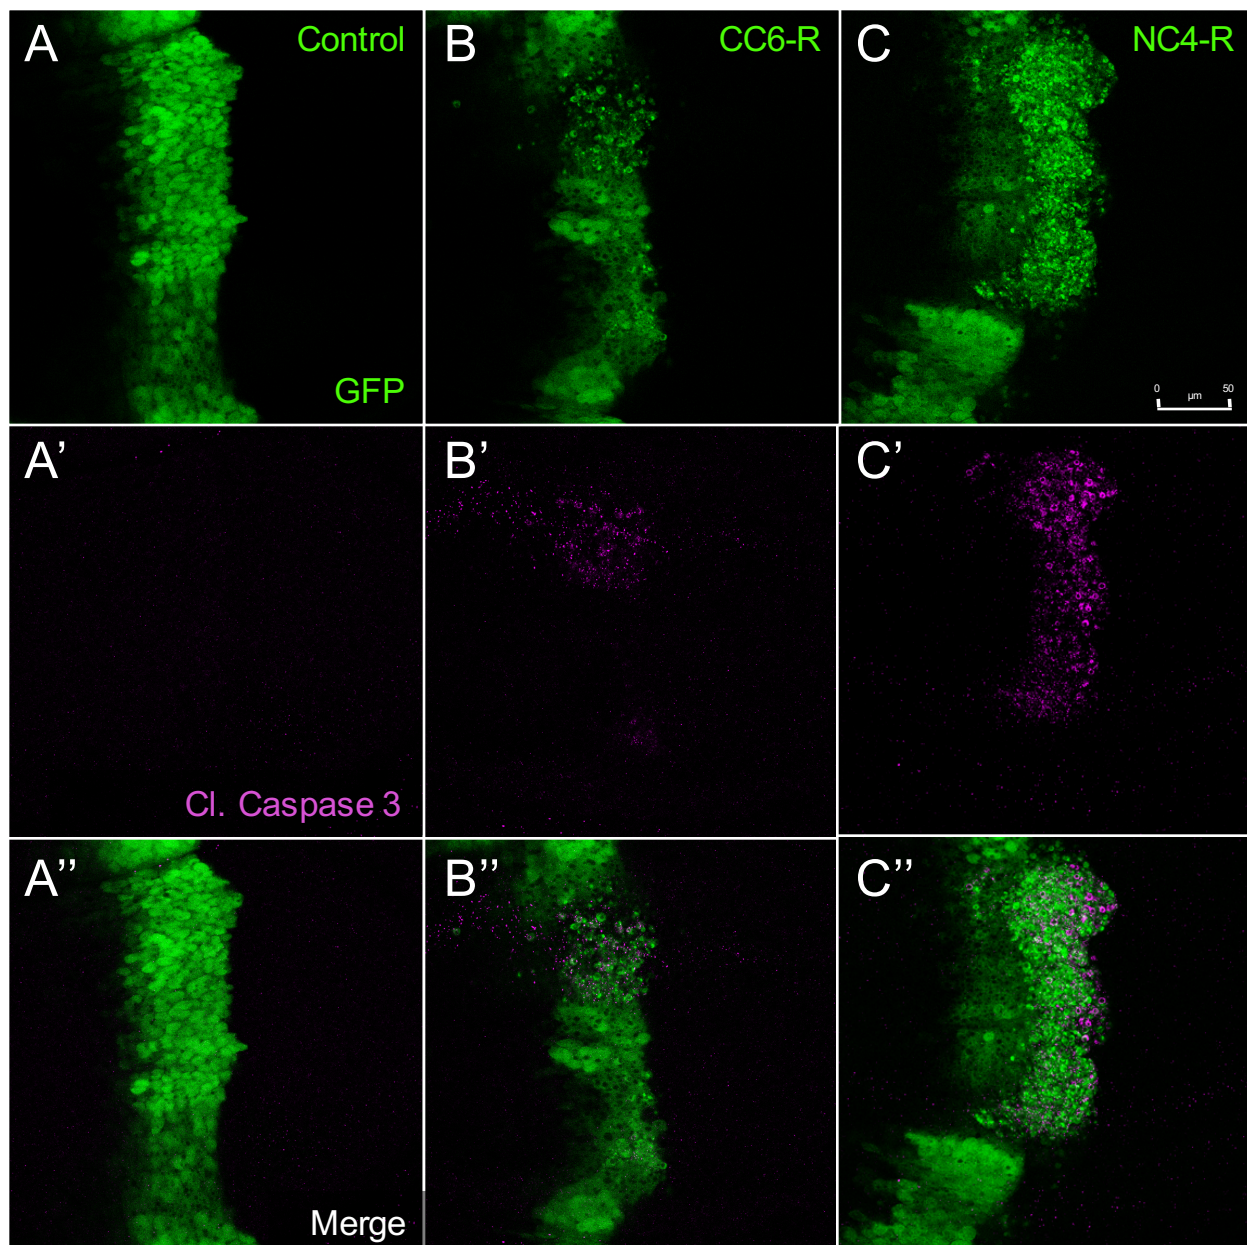

Levinson et al, Supplemental Figure 4



## CCDC6-RET

| <i>Drosophila</i> Kinase | Human Ortholog | % Pupariation |
|--------------------------|----------------|---------------|
| Control                  | -              | 21%           |
| bsk                      | JNK            | 94%           |
| wnk                      | WNK1           | 79%           |
| slik                     | STK10          | 73%           |
| grp                      | CHEK1          | 62%           |
| btk29a                   | TEC            | 53%           |
| gek                      | CDC42BPA       | 50%           |

## NCOA4-RET

| <i>Drosophila</i> Kinase | Human Ortholog | % Pupariation |
|--------------------------|----------------|---------------|
| Control                  | -              | 0%            |
| bsk                      | JNK            | 37%           |
| hppy                     | MAP4K3         | 23%           |
| sqa                      | MYLK3          | 19%           |
| src42A                   | FRK            | 19%           |
| wee                      | WEE1           | 18%           |
| for                      | PRKG1          | 17%           |
| hpo                      | STK3           | 15%           |
| takl2                    | MAP3K7         | 15%           |
| pvr                      | VEGFR          | 11%           |
| shark                    | SYK            | 5%            |
| btk29A                   | TEC            | 3%            |

## CCDC6-RET

| Drug        | % Pupariation | SEM |
|-------------|---------------|-----|
| Control     | 4%            | 2%  |
| ponatinib   | 51%           | 7%  |
| AD81        | 38%           | 2%  |
| regorafenib | 17%           | 5%  |
| gefitinib   | 17%           | 4%  |
| vandetinib  | 12%           | 1%  |

## NCOA4-RET

| Drug         | % Pupariation | SEM |
|--------------|---------------|-----|
| Control      | 0%            | 0%  |
| ponatinib    | 20%           | 6%  |
| AD81         | 53%           | 10% |
| regorafenib  | 11%           | 9%  |
| sorafenib    | 24%           | 2%  |
| cabozantinib | 10%           | 2%  |

## Drug effects on wing invasion

| CCDC6-RET |             |             |                 |               |                |
|-----------|-------------|-------------|-----------------|---------------|----------------|
|           | <b>none</b> | <b>weak</b> | <b>moderate</b> | <b>severe</b> | <b>p-value</b> |
| Ctrl      | 0           | 10          | 5               | 0             |                |
| vand.     | 9           | 4           | 0               | 0             | 1.20E-04       |
| AD81      | 13          | 2           | 0               | 0             | 1.80E-06       |

| NCOA4-RET |             |             |                 |               |                |
|-----------|-------------|-------------|-----------------|---------------|----------------|
|           | <b>none</b> | <b>weak</b> | <b>moderate</b> | <b>severe</b> | <b>p-value</b> |
| Ctrl      | 0           | 0           | 23              | 2             |                |
| vand.     | 0           | 0           | 10              | 0             | 1              |
| AD81      | 11          | 15          | 0               | 0             | 4.00E-15       |

| #  | Drug Name              | Conc. (uM) | % Pupariation: CCDC6-RET | P value (Mann Whitney) | % Pupariation: NCOA4-RET | P value (Mann Whitney) |
|----|------------------------|------------|--------------------------|------------------------|--------------------------|------------------------|
|    | 0.1% DMSO              |            | 4%                       |                        | 0%                       |                        |
| 1  | abiraterone acetate    | 50         | 1%                       |                        | 0%                       |                        |
| 2  | Afatinib               | 200        | 2%                       |                        | 0%                       |                        |
| 3  | anastrozole            | 100        | 4%                       |                        | 0%                       |                        |
| 4  | Axitinib               | 150        | 0%                       |                        | 0%                       |                        |
| 5  | bendamustine HCL       | 200        | 0%                       |                        | 0%                       |                        |
| 6  | bortezomib             | 1          | 2%                       |                        | 0%                       |                        |
| 7  | Bosutinib              | 200        | 2%                       |                        | 0%                       |                        |
| 8  | busulflex              | 200        | 0%                       |                        | 3%                       |                        |
| 9  | cabazitaxel            | 100        | 4%                       |                        | 0%                       |                        |
| 10 | Cabozantinib           | 200        | 1%                       |                        | 10%                      | 0.0001                 |
| 11 | Capecitabine (xeloda)  | 200        | 0%                       |                        | 0%                       |                        |
| 12 | Carfilzomib            | 100        | 0%                       |                        | 0%                       |                        |
| 13 | Cinacalcet             | 200        | 0%                       |                        | 0%                       |                        |
| 14 | clofarabine            | 100        | 0%                       |                        | 0%                       |                        |
| 15 | crizotinib             | 50         | 6%                       |                        | 0%                       |                        |
| 16 | Dabrafenib             | 200        | 1%                       |                        | 0%                       |                        |
| 17 | dasatinib              | 10         | 0%                       |                        | 0%                       |                        |
| 18 | docetaxel              | 100        | 1%                       |                        | 0%                       |                        |
| 19 | doxorubicin            | 200        | 0%                       |                        | 0%                       |                        |
| 20 | ellence                | 200        | 0%                       |                        | 0%                       |                        |
| 21 | Enzalutamide           | 100        | 0%                       |                        | 0%                       |                        |
| 22 | erlotinib              | 25         | 0%                       |                        | 0%                       |                        |
| 23 | Everolimus             | 1          | 0%                       |                        | 0%                       |                        |
| 24 | exemestane (aromasin)  | 200        | 5%                       |                        | 0%                       |                        |
| 25 | flutamide              | 200        | 0%                       |                        | 0%                       |                        |
| 26 | fulvestrant            | 200        | 0%                       |                        | 0%                       |                        |
| 27 | gefitinib              | 10         | 17%                      | 0.0381                 | 0%                       |                        |
| 28 | gemcitabine            | 1          | 0%                       |                        | 0%                       |                        |
| 29 | imatinib               | 200        | 0%                       |                        | 0%                       |                        |
| 30 | Irinotecan (camptosar) | 200        | 1%                       |                        | 0%                       |                        |
| 31 | lapatinib              | 200        | 0%                       |                        | 0%                       |                        |
| 32 | Lenalidomide           | 200        | 0%                       |                        | 0%                       |                        |
| 33 | Letrozole              | 200        | 0%                       |                        | 0%                       |                        |
| 34 | nelarabine             | 200        | 1%                       |                        | 0%                       |                        |
| 35 | nilotinib              | 50         | 1%                       |                        | 0%                       |                        |
| 36 | pamidronate            | 150        | 3%                       |                        | 0%                       |                        |
| 37 | Pazopanib              | 200        | 0%                       |                        | 0%                       |                        |
| 38 | pemetrexed DiNA        | 1          | 0%                       |                        | 0%                       |                        |
| 39 | Pomalidomide           | 200        | 0%                       |                        | 0%                       |                        |
| 40 | Ponatinib              | 200        | 51%                      | 0.0095                 | 20%                      | 0.0001                 |
| 41 | Rapamycin (sirolimus)  | 1          | 0%                       |                        | 0%                       |                        |
| 42 | Regorafenib            | 10         | 17%                      | 0.0381                 | 11%                      | 0.0082                 |
| 43 | sorafenib              | 200        | 2%                       |                        | 24%                      | 0.0001                 |
| 44 | Sunitinib malate       | 100        | 4%                       |                        | 0%                       |                        |
| 45 | Tamoxifen (nolvadex)   | 200        | 4%                       |                        | 0%                       |                        |
| 46 | temsirolimus           | 1          | 0%                       |                        | 0%                       |                        |
| 47 | topotecan HCL          | 1          | 0%                       |                        | 0%                       |                        |
| 48 | Trametinib             | 1          | 3%                       |                        | 0%                       |                        |
| 49 | vandetanib             | 100        | 12%                      | 0.0238                 | 0%                       |                        |
| 50 | vemurafenib            | 200        | 2%                       |                        | 0%                       |                        |
| 51 | Vismodegib             | 1          | 5%                       |                        | 0%                       |                        |
| 52 | vorinostat             | 10         | 6%                       |                        | 0%                       |                        |
| 53 | zoledronic acid        | 14         | 2%                       |                        | 0%                       |                        |
| 54 | ibrutinib              | 100        | 3%                       |                        | 0%                       |                        |
| 55 | AD81                   | 100        | 38%                      | 0.0095                 | 53%                      | 0.0001                 |



# NCOA4-RET Genetic + Drug combinations

% Pupariation

| Drug   | Conc. (uM) | Kinome LOF Allele |     |     |        |      |      |       |     |      |        |       |     |
|--------|------------|-------------------|-----|-----|--------|------|------|-------|-----|------|--------|-------|-----|
|        |            | Ctrl              | bsk | for | btk29A | wee  | sqa  | shark | hpo | hppy | src42A | takl1 | pvr |
| DMSO   | 0.20%      | 0%                | 7%  | 3%  | 0%     | 0%   | 0%   | 0%    | 0%  | 2%   | 0%     | 0%    | 0%  |
| ponat. | 200        | 12%               | 11% | 0%  | 0%     | 26%  | 41%  | 0%    | 0%  | 11%  | 0%     | 32%   | 26% |
| vand.  | 100        | 0%                | 9%  | 10% | 2%     | 3%   | 10%  | 6%    | 0%  | 11%  | 4%     | 11%   | 17% |
| AD81   | 100        | 29%               | 50% | 84% | 95%    | 100% | 63%  | 120%  | 3%  | 63%  | 41%    | 90%   | 30% |
| gef.   | 10         | 0%                | 0%  | 0%  | 0%     | 10%  | 6%   | 0%    | 0%  | 0%   | 0%     | 0%    | 0%  |
| cabo.  | 200        | 0%                | 10% | 0%  | 0%     | 28%  | 3%   | 11%   | 0%  | 16%  | 0%     | 27%   | 0%  |
| soraf. | 200        | 0%                | 63% | 61% | 30%    | 111% | 100% | 79%   | 53% | 69%  | 34%    | 67%   | 25% |
| rego.  | 100        | 10%               | 81% | 47% | 39%    | 68%  | 95%  | -     | 40% | 78%  | 34%    | 70%   | 0%  |

# CCDC6-RET Genetic + Drug combinations

% Eclosure

| Drug   | Conc. (uM) | Kinome LOF Allele |     |        |     |     |     |      |
|--------|------------|-------------------|-----|--------|-----|-----|-----|------|
|        |            | Ctrl              | bsk | btk29A | gek | grp | wnk | slik |
| DMSO   | 0.20%      | 0%                | 15% | 0%     | 0%  | 0%  | 5%  | 0%   |
| ponat. | 200        | 0%                | 33% | 0%     | 0%  | 0%  | 0%  | 0%   |
| vand.  | 100        | 2%                | 43% | 4%     | 0%  | 0%  | 0%  | 0%   |
| AD81   | 100        | 0%                | 64% | 0%     | 0%  | 0%  | 0%  | 0%   |
| gef.   | 10         | 0%                | 0%  | 0%     | 0%  | 0%  | 0%  | 0%   |
| cabo.  | 200        | 0%                | 36% | 6%     | 0%  | 0%  | 0%  | 0%   |
| soraf. | 200        | 0%                | 50% | 0%     | 0%  | 5%  | 0%  | 0%   |
| rego.  | 100        | 0%                | 60% | 0%     | 0%  | 0%  | 0%  | 0%   |

# NCOA4-RET Drug+ Drug combinations

% Pupariation

|              |            | Control | ibrutinib<br>(btk29A) | AZD1775<br>(wee) | HA-100<br>(sqa) |
|--------------|------------|---------|-----------------------|------------------|-----------------|
|              | Conc. (uM) |         | 50                    | 50               | 50              |
| 0.2%<br>DMSO |            | 0%      | 0%                    | 0%               | 0%              |
| AD81         | 100        | 40%     | 78%                   | 107%             | 113%            |
| sorafenib    | 200        | 13%     | 30%                   | 38%              | 12%             |
| regorafenib  | 100        | 18%     | 21%                   | 25%              | 41%             |

p value (Mann-Whitney)

|              |            | Control | ibrutinib<br>(btk29A) | AZD1775<br>(wee) | HA-100<br>(sqa) |
|--------------|------------|---------|-----------------------|------------------|-----------------|
|              | Conc. (uM) |         | 50                    | 50               | 50              |
| 0.2%<br>DMSO |            |         |                       |                  |                 |
| AD81         | 100        |         | 0.0286                | 0.0216           | 0.0095          |
| sorafenib    | 200        |         | 0.0524                | 0.0396           | 0.5818          |
| regorafenib  | 100        |         | 0.8575                | 0.3938           | 0.7859          |
